# Supplementary material for: Standard blood laboratory values as a clinical support tool to distinguish between SARS-CoV-2 positive and negative patients
Source: PubMed Central journal article supplement (PMC8087776; doi:10.1038/s41598-021-88844-x), 2021-04-30
Supplement: 41598_2021_88844_MOESM1_ESM.pdf [file 41598_2021_88844_MOESM1_ESM.pdf]

# Standard blood laboratory values as a clinical support tool to distinguish between SARS-CoV-2 positive and negative patients

Rainer Thell<sup>1,2,3</sup>, Jascha Zimmermann<sup>4</sup>, Marton Szell<sup>1,2</sup>, Sabine Tomez<sup>1</sup>, Philip Eisenburger<sup>1,4</sup>, Moritz Haugk<sup>1</sup>, Anna Kreil<sup>1</sup>, Alexander Spiel<sup>1</sup>, Amelie Blaschke<sup>1,2</sup>, Anna Klicpera<sup>1,2</sup>, Oskar Janata<sup>1,2</sup>, Walter Krugluger<sup>1,2</sup>, Christian Sebesta<sup>1,2</sup>, M.D., Harald Herkner<sup>3</sup>, M.D., and Brenda Laky<sup>3,5,\*</sup>

<sup>1</sup>Wiener Gesundheitsverbund, Vienna, Austria; <sup>2</sup>Department of Internal Medicine 2, Emergency Department, Klinik Donaustadt, 122 Langobardenstrasse, 1210 Vienna, Austria; <sup>3</sup>Medical University Vienna, Austria; <sup>4</sup>Sigmund Freud University, Medical School, Vienna, Austria; <sup>5</sup>Austrian Research Group for Regenerative and Orthopedic Medicine (AURROM), Hartmannngasse 15/10, 1050 Vienna, Austria

\*Corresponding author: Brenda Laky (ORCID) 0000-0003-1198-4132 (e-mail)

brenda.laky@meduniwien.ac.at or brenda.laky@aurrom.org

**Supplement Table 1. Comparison of Standard Blood Laboratory Parameters between COVID-19 Positive and Negative tested Patients.**

| Parameters                                                | N*  | COVID-19 TOTAL       | N*  | COVID-19 Positive   | N*  | COVID-19 Negative    | P value             | Pattern    |
|-----------------------------------------------------------|-----|----------------------|-----|---------------------|-----|----------------------|---------------------|------------|
| <b>Blood count</b>                                        |     |                      |     |                     |     |                      |                     |            |
| White blood cell count or Leucocytes (10 <sup>9</sup> /L) |     |                      |     |                     |     |                      |                     |            |
| Median (IQR)                                              | 585 | 7.90 (5.70 to 11.10) | 207 | 6.13 (4.80 to 8.08) | 378 | 9.06 (6.59 to 12.45) | <0.001 <sup>†</sup> | ↓          |
| Distribution – no./total no. (%)                          |     |                      |     |                     |     |                      |                     |            |
| Low (<4.0)                                                | 44  | 7.5                  | 24  | 11.6                | 20  | 5.3                  | <0.001 <sup>‡</sup> | ⊥ (not ↑)  |
| Normal (4.0-10.0)                                         | 356 | 60.9                 | 155 | 74.9                | 201 | 53.2                 |                     |            |
| High (>10.0)                                              | 185 | 31.6                 | 28  | 13.5                | 157 | 41.5                 |                     |            |
| Neutrophils (10 <sup>9</sup> /L)                          |     |                      |     |                     |     |                      |                     |            |
| Median (IQR)                                              | 534 | 5.79 (4.06 to 8.46)  | 182 | 4.45 (3.12 to 6.62) | 352 | 6.66 (4.67 to 9.78)  | <0.001 <sup>†</sup> | ↓          |
| Distribution – no./total no. (%)                          |     |                      |     |                     |     |                      |                     |            |
| Low (<1.5)                                                | 4   | 0.7                  | 4   | 2.2                 | 0   | 0                    | <0.001 <sup>‡</sup> | ⊥ (not ↑)  |
| Normal (1.5-7.7)                                          | 366 | 68.5                 | 150 | 82.4                | 216 | 61.4                 |                     |            |
| High (>7.7)                                               | 164 | 30.7                 | 28  | 15.4                | 136 | 38.6                 |                     |            |
| Basophils (10 <sup>9</sup> /L)                            |     |                      |     |                     |     |                      |                     |            |
| Median (IQR)                                              | 534 | 0.02 (0.01 to 0.04)  | 182 | 0.02 (0.01 to 0.03) | 352 | 0.03 (0.02 to 0.04)  | <0.001 <sup>†</sup> | ↓          |
| Distribution – no./total no. (%)                          |     |                      |     |                     |     |                      |                     |            |
| Normal (0.0-0.2)                                          | 532 | 99.6                 | 182 | 100                 | 350 | 99.4                 | 0.550 <sup>§</sup>  | ⊥ (=)      |
| High (>0.2)                                               | 2   | 0.4                  | 0   | 0                   | 2   | 0.6                  |                     |            |
| Eosinophils (10 <sup>9</sup> /L)                          |     |                      |     |                     |     |                      |                     |            |
| Median (IQR)                                              | 534 | 0.06 (0.01 to 0.16)  | 182 | 0.01 (0.00 to 0.05) | 352 | 0.10 (0.04 to 0.20)  | <0.001 <sup>†</sup> | ↓          |
| Distribution – no./total no. (%)                          |     |                      |     |                     |     |                      |                     |            |
| Low (<0.1)                                                | 331 | 62.0                 | 155 | 85.2                | 176 | 50.0                 | <0.001 <sup>‡</sup> | ↓          |
| Normal (0.1-0.5)                                          | 195 | 36.5                 | 26  | 14.3                | 169 | 48.0                 |                     |            |
| High (>0.5)                                               | 8   | 1.5                  | 1   | 0.5                 | 7   | 2.0                  |                     |            |
| Lymphocytes (10 <sup>9</sup> /L)                          |     |                      |     |                     |     |                      |                     |            |
| Median (IQR)                                              | 534 | 1.10 (0.75 to 1.55)  | 182 | 0.96 (0.65 to 1.36) | 352 | 1.21 (0.84 to 1.70)  | <0.001 <sup>†</sup> | ↓          |
| Distribution – no./total no. (%)                          |     |                      |     |                     |     |                      |                     |            |
| Low (<1.5)                                                | 382 | 71.5                 | 150 | 82.4                | 232 | 65.9                 | <0.001 <sup>‡</sup> | ↓ (less =) |
| Normal (1.5-4.5)                                          | 151 | 28.3                 | 31  | 17.0                | 120 | 34.1                 |                     |            |
| High (>4.5)                                               | 1   | 0.2                  | 1   | 0.6                 | 0   | 0                    |                     |            |
| Neutrophil-to-lymphocyte ratio                            |     |                      |     |                     |     |                      |                     |            |
| Median (IQR)                                              | 534 | 5.29 (3.16-8.90)     | 534 | 5.00 (2.83-8.10)    |     | 5.44 (3.30-9.25)     | 0.032 <sup>†</sup>  | ↓          |
| Distribution – no./total no. (%)                          |     |                      |     |                     |     |                      |                     |            |
| ≤2.33                                                     | 63  | 11.8                 | 36  | 19.8                | 27  | 7.7                  | <0.001 <sup>‡</sup> | more ↓     |
| >2.33                                                     | 471 | 88.2                 | 146 | 80.2                | 325 | 92.3                 |                     |            |
| Monocytes (10 <sup>9</sup> /L)                            |     |                      |     |                     |     |                      |                     |            |
| Median (IQR)                                              | 534 | 0.53 (0.36 to 0.74)  | 182 | 0.47 (0.30 to 0.64) | 352 | 0.56 (0.40 to 0.77)  | <0.001 <sup>†</sup> | ↓          |
| Distribution – no./total no. (%)                          |     |                      |     |                     |     |                      |                     |            |
| Low (<0.1)                                                | 3   | 0.6                  | 0   | 0                   | 3   | 0.9                  | 0.013 <sup>‡</sup>  | ⊥ (less ↓) |
| Normal (0.1-0.9)                                          | 465 | 87.0                 | 169 | 92.9                | 296 | 84.0                 |                     |            |
| High (>0.9)                                               | 66  | 12.4                 | 13  | 7.1                 | 53  | 15.1                 |                     |            |

**Supplement Table 1 (cont.). Comparison of Standard Blood Laboratory Parameters between COVID-19 Positive and Negative tested Patients.**

| Parameters                                                 | N*  | COVID-19 TOTAL            | N*  | COVID-19 Positive         | N*  | COVID-19 Negative         | P value             | Pattern    |
|------------------------------------------------------------|-----|---------------------------|-----|---------------------------|-----|---------------------------|---------------------|------------|
| <b>Blood count (cont.)</b>                                 |     |                           |     |                           |     |                           |                     |            |
| Platelet count or Thrombocytes (10 <sup>9</sup> /L)        |     |                           |     |                           |     |                           |                     |            |
| Median (IQR)                                               | 584 | 217.00 (166.25 to 282.75) | 207 | 201.00 (161.00 to 252.00) | 377 | 227.00 (169.50 to 299.00) | 0.002 <sup>†</sup>  | ↓          |
| Distribution – no./total no. (%)                           |     |                           |     |                           |     |                           |                     |            |
| Low (<150)                                                 | 104 | 17.8                      | 35  | 16.9                      | 69  | 18.3                      | 0.052 <sup>‡</sup>  | ⊥ (=)      |
| Normal (150-370)                                           | 414 | 70.9                      | 157 | 75.9                      | 257 | 68.2                      |                     |            |
| High (>370)                                                | 66  | 11.3                      | 15  | 7.2                       | 51  | 13.5                      |                     |            |
| Red blood cell count or Erythrocytes (10 <sup>12</sup> /L) |     |                           |     |                           |     |                           |                     |            |
| Median (IQR)                                               | 585 | 4.20 (3.60 to 4.71)       | 207 | 4.60 (4.11 to 5.00)       | 378 | 3.90 (3.40 to 4.50)       | <0.001 <sup>†</sup> | ↑          |
| Distribution – no./total no. (%)                           |     |                           |     |                           |     |                           |                     |            |
| Low (<4.3)                                                 | 310 | 53.0                      | 67  | 32.4                      | 243 | 64.3                      | <0.001 <sup>‡</sup> | ⊥ (not ↓)  |
| Normal (4.3-5.7)                                           | 270 | 46.2                      | 136 | 65.7                      | 134 | 35.4                      |                     |            |
| High (>5.7)                                                | 5   | 0.8                       | 4   | 1.9                       | 1   | 0.3                       |                     |            |
| Hemoglobin (g/dL)                                          |     |                           |     |                           |     |                           |                     |            |
| Median (IQR)                                               | 585 | 12.50 (10.70 to 14.10)    | 207 | 13.50 (12.30 to 14.70)    | 378 | 11.75 (10.28 to 13.33)    | <0.001 <sup>†</sup> | ↑          |
| Distribution – no./total no. (%)                           |     |                           |     |                           |     |                           |                     |            |
| Low (f: <11.8; m: <13.5)                                   | 301 | 51.5                      | 67  | 32.4                      | 234 | 61.9                      | <0.001 <sup>‡</sup> | ⊥ (not ↓)  |
| Normal (f: 11.8-15.8; m: 13.5-17.2)                        | 279 | 47.7                      | 138 | 66.6                      | 141 | 37.3                      |                     |            |
| High (f: 15.8; m: >17.2)                                   | 5   | 0.8                       | 2   | 1.0                       | 3   | 0.8                       |                     |            |
| Hematocrit (%)                                             |     |                           |     |                           |     |                           |                     |            |
| Median (IQR)                                               | 585 | 37.20 (32.40 to 41.55)    | 207 | 39.70 (36.20 to 42.80)    | 378 | 35.70 (31.05 to 40.13)    | <0.001 <sup>†</sup> | ↑          |
| Distribution – no./total no. (%)                           |     |                           |     |                           |     |                           |                     |            |
| Low (f: <38.0; m: <39.5)                                   | 354 | 60.5                      | 90  | 43.5                      | 264 | 69.9                      | <0.001 <sup>‡</sup> | ⊥ (not ↓)  |
| Normal (f: 38.0-44.0; m: 39.5-50.5)                        | 216 | 36.9                      | 110 | 53.1                      | 106 | 28.0                      |                     |            |
| High (f: >44.0; m: >50.5)                                  | 15  | 2.6                       | 7   | 3.4                       | 8   | 2.1                       |                     |            |
| <b>Inflammation</b>                                        |     |                           |     |                           |     |                           |                     |            |
| C-reactive protein (mg/dL)                                 |     |                           |     |                           |     |                           |                     |            |
| Median (IQR)                                               | 586 | 43.62 (10.10 to 105.00)   | 205 | 61.80 (25.45 to 129.50)   | 381 | 33.60 (7.25 to 93.56)     | <0.001 <sup>†</sup> | ↑          |
| Distribution – no./total no. (%)                           |     |                           |     |                           |     |                           |                     |            |
| Normal (≤0.5)                                              | 8   | 1.4                       | 1   | 0.5                       | 7   | 1.8                       | 0.179 <sup>‡</sup>  | = (↑)      |
| High (>0.5)                                                | 578 | 98.6                      | 204 | 99.5                      | 374 | 98.2                      |                     |            |
| Distribution – no./total no. (%)                           |     |                           |     |                           |     |                           |                     |            |
| < 22 mg/dL                                                 | 205 | 35.0                      | 44  | 21.5                      | 161 | 42.3                      | <0.001 <sup>†</sup> | ↑ (less ↓) |
| ≥ 22 mg/dL                                                 | 381 | 65.0                      | 161 | 78.5                      | 220 | 57.7                      |                     |            |
| Procalcitonin (ng/mL)                                      |     |                           |     |                           |     |                           |                     |            |
| Median (IQR)                                               | 130 | 0.13 (0.05 to 0.48)       | 43  | 0.12 (0.05 to 0.28)       | 87  | 0.16 (0.05 to 0.64)       | 0.314 <sup>†</sup>  | =          |
| Distribution – no./total no. (%)                           |     |                           |     |                           |     |                           |                     |            |
| Normal (≤0.5)                                              | 102 | 78.5                      | 39  | 90.7                      | 63  | 72.4                      | 0.017 <sup>‡</sup>  | ⊥ (not ↑)  |
| High (>0.5)                                                | 28  | 21.5                      | 4   | 9.3                       | 24  | 27.6                      |                     |            |

**Supplement Table 1 (cont.). Comparison of Standard Blood Laboratory Parameters between COVID-19 Positive and Negative tested Patients.**

| Parameters                       | N*  | COVID-19 TOTAL            | N*  | COVID-19 Positive         | N*  | COVID-19 Negative         | P value             | Pattern    |
|----------------------------------|-----|---------------------------|-----|---------------------------|-----|---------------------------|---------------------|------------|
| <b>Blood chemistry</b>           |     |                           |     |                           |     |                           |                     |            |
| Albumin (g/L)                    |     |                           |     |                           |     |                           |                     |            |
| Median (IQR)                     | 362 | 30.00 (26.00 to 36.00)    | 55  | 30.00 (23.00 to 34.00)    | 307 | 31.00 (26.00 to 36.00)    | 0.207 <sup>†</sup>  | =          |
| Distribution – no./total no. (%) |     |                           |     |                           |     |                           |                     |            |
| Low (<35.0)                      | 252 | 69.6                      | 44  | 80.0                      | 208 | 67.8                      | 0.080 <sup>§</sup>  | = (↓)      |
| Normal (35.0-52.0)               | 110 | 30.4                      | 11  | 20.0                      | 99  | 32.2                      |                     |            |
| High (>52.0)                     | 0   | 0                         | 0   | 0                         | 0   | 0                         |                     |            |
| Ferritin (mcg/L)                 |     |                           |     |                           |     |                           |                     |            |
| Median (IQR)                     | 117 | 169.00 (80.50 to 561.00)  | 20  | 579.00 (197.5 to 1704.28) | 97  | 149.00 (57.00 to 370.50)  | <0.001 <sup>†</sup> | ↑↑         |
| Distribution – no./total no. (%) |     |                           |     |                           |     |                           |                     |            |
| Low (<23.0)                      | 4   | 3.4                       | 0   | 0                         | 4   | 4.1                       | 0.080 <sup>‡</sup>  | = (↑)      |
| Normal (23.0-110.0)              | 39  | 33.4                      | 3   | 15.0                      | 36  | 37.1                      |                     |            |
| High (>110.0)                    | 74  | 63.2                      | 17  | 85.0                      | 57  | 58.8                      |                     |            |
| <b>Metabolism</b>                |     |                           |     |                           |     |                           |                     |            |
| Glucose (mg/dL)                  |     |                           |     |                           |     |                           |                     |            |
| Median (IQR)                     | 541 | 112.00 (96.00 to 143.00)  | 204 | 112.00 (99.25 to 141.50)  | 337 | 112.00 (95.00 to 144.00)  | 0.272 <sup>†</sup>  | =          |
| Distribution – no./total no. (%) |     |                           |     |                           |     |                           |                     |            |
| Low (<70)                        | 13  | 2.4                       | 4   | 2.0                       | 9   | 2.7                       | 0.232 <sup>‡</sup>  | = (↑)      |
| Normal (70-100)                  | 151 | 27.9                      | 49  | 24.0                      | 102 | 30.3                      |                     |            |
| High (>100)                      | 377 | 69.7                      | 151 | 74.0                      | 226 | 67.0                      |                     |            |
| <b>Electrolytes</b>              |     |                           |     |                           |     |                           |                     |            |
| Potassium (mmol/L)               |     |                           |     |                           |     |                           |                     |            |
| Median (IQR)                     | 539 | 4.00 (3.70 to 4.20)       | 183 | 4.00 (3.70 to 4.20)       | 356 | 3.90 (3.60 to 4.20)       | 0.149 <sup>†</sup>  | =          |
| Distribution – no./total no. (%) |     |                           |     |                           |     |                           |                     |            |
| Low (<3.5)                       | 65  | 12.1                      | 17  | 9.3                       | 48  | 13.5                      | 0.285 <sup>†</sup>  | = (⊥)      |
| Normal (3.5-5.5)                 | 469 | 87.0                      | 165 | 90.2                      | 304 | 85.4                      |                     |            |
| High (>5.5)                      | 5   | 0.9                       | 1   | 0.5                       | 4   | 1.1                       |                     |            |
| Sodium (mmol/L)                  |     |                           |     |                           |     |                           |                     |            |
| Median (IQR)                     | 584 | 138.00 (135.00 to 140.00) | 207 | 136.00 (133.00 to 139.00) | 377 | 138.00 (136.00 to 140.00) | <0.001 <sup>†</sup> | ↓          |
| Distribution – no./total no. (%) |     |                           |     |                           |     |                           |                     |            |
| Low (<135)                       | 131 | 22.4                      | 72  | 34.8                      | 59  | 15.7                      | <0.001 <sup>‡</sup> | ⊥ (more ↓) |
| Normal (135-150)                 | 449 | 76.9                      | 133 | 64.2                      | 316 | 83.8                      |                     |            |
| High (>150)                      | 4   | 0.7                       | 2   | 1.0                       | 2   | 0.5                       |                     |            |

**Supplement Table 1 (cont.). Comparison of Standard Blood Laboratory Parameters between COVID-19 Positive and Negative tested Patients.**

| Parameters                                  | N*  | COVID-19 TOTAL         | N*  | COVID-19 Positive      | N*  | COVID-19 Negative      | P value             | Pattern    |
|---------------------------------------------|-----|------------------------|-----|------------------------|-----|------------------------|---------------------|------------|
| <b>Coagulation</b>                          |     |                        |     |                        |     |                        |                     |            |
| Activated partial thromboplastin time (sec) |     |                        |     |                        |     |                        |                     |            |
| Median (IQR)                                | 439 | 28.00 (25.00 to 32.50) | 141 | 29.90 (27.00 to 33.05) | 298 | 27.00 (24.00 to 31.00) | <0.001 <sup>†</sup> | ↑          |
| Distribution – no./total no. (%)            |     |                        |     |                        |     |                        |                     |            |
| Low (<21)                                   | 10  | 2.3                    | 3   | 2.1                    | 7   | 2.4                    | <0.001 <sup>‡</sup> | ⊥ (more ↑) |
| Normal (21-32)                              | 316 | 72.0                   | 85  | 60.3                   | 231 | 77.5                   |                     |            |
| High (>32)                                  | 113 | 25.7                   | 53  | 37.6                   | 60  | 20.1                   |                     |            |
| <b>Liver function</b>                       |     |                        |     |                        |     |                        |                     |            |
| Alanine aminotransferase (U/L)              |     |                        |     |                        |     |                        |                     |            |
| Median (IQR)                                | 517 | 27.00 (17.00 to 50.00) | 171 | 32.00 (21.00 to 53.00) | 346 | 25.00 (15.00 to 45.00) | 0.001 <sup>†</sup>  | ↑          |
| Distribution – no./total no. (%)            |     |                        |     |                        |     |                        |                     |            |
| Normal (≤45)                                | 372 | 72.0                   | 111 | 64.9                   | 261 | 75.4                   | 0.012 <sup>‡</sup>  | ⊥ (more ↑) |
| High (>45)                                  | 145 | 28.0                   | 60  | 35.1                   | 85  | 24.6                   |                     |            |
| Aspartate aminotransferase (U/L)            |     |                        |     |                        |     |                        |                     |            |
| Median (IQR)                                | 329 | 33.00 (23.00 to 62.00) | 124 | 47.00 (29.00 to 70.00) | 205 | 26.00 (20.00 to 52.00) | <0.001 <sup>†</sup> | ↑          |
| Distribution – no./total no. (%)            |     |                        |     |                        |     |                        |                     |            |
| Normal (≤35)                                | 176 | 53.5                   | 46  | 37.1                   | 130 | 63.4                   | <0.001 <sup>‡</sup> | ↑ (not ↓)  |
| High (>35)                                  | 153 | 46.5                   | 78  | 62.9                   | 75  | 36.6                   |                     |            |
| Total Bilirubin (mg/dL)                     |     |                        |     |                        |     |                        |                     |            |
| Median (IQR)                                | 520 | 0.60 (0.40 to 0.80)    | 173 | 0.60 (0.40 to 0.80)    | 347 | 0.50 (0.40 to 0.90)    | 0.311 <sup>†</sup>  | =          |
| Distribution – no./total no. (%)            |     |                        |     |                        |     |                        |                     |            |
| Low (<0.3)                                  | 47  | 9.0                    | 11  | 6.3                    | 36  | 10.4                   | 0.005 <sup>‡</sup>  | ⊥ (less ↑) |
| Normal (0.3-1.0)                            | 398 | 76.5                   | 147 | 85.0                   | 251 | 72.3                   |                     |            |
| High (>1.0)                                 | 75  | 14.4                   | 15  | 8.7                    | 60  | 17.3                   |                     |            |
| Gamma glutamyl transpeptidase (U/L)         |     |                        |     |                        |     |                        |                     |            |
| Median (IQR)                                | 517 | 43.00 (25.00 to 94.50) | 171 | 46.00 (27.00 to 88.00) | 346 | 41.00 (23.00 to 98.25) | 0.186 <sup>†</sup>  | =          |
| Distribution – no./total no. (%)            |     |                        |     |                        |     |                        |                     |            |
| Normal (≤60)                                | 331 | 64.0                   | 109 | 63.7                   | 222 | 64.2                   | 0.926 <sup>‡</sup>  | =          |
| High (>60)                                  | 186 | 36.0                   | 62  | 36.3                   | 124 | 35.8                   |                     |            |
| Lipase (U/L)                                |     |                        |     |                        |     |                        |                     |            |
| Median (IQR)                                | 433 | 29.00 (18.00 to 50.50) | 151 | 39.00 (25.00 to 65.00) | 282 | 23.00 (14.00 to 41.00) | <0.001 <sup>†</sup> | ↑          |
| Distribution – no./total no. (%)            |     |                        |     |                        |     |                        |                     |            |
| Normal (≤60.0)                              | 346 | 79.9                   | 106 | 70.2                   | 240 | 85.1                   | <0.001 <sup>‡</sup> | ⊥ (more ↑) |
| High (>60.0)                                | 87  | 20.1                   | 45  | 29.8                   | 42  | 14.9                   |                     |            |

**Supplement Table 1 (cont.). Comparison of Standard Blood Laboratory Parameters between COVID-19 Positive and Negative tested Patients.**

| Parameters                       | N*  | COVID-19 TOTAL            | N*  | COVID-19 Positive         | N*  | COVID-19 Negative         | P value             | Pattern    |
|----------------------------------|-----|---------------------------|-----|---------------------------|-----|---------------------------|---------------------|------------|
| <b>Heart function</b>            |     |                           |     |                           |     |                           |                     |            |
| Creatine Kinase (U/L)            |     |                           |     |                           |     |                           |                     |            |
| Median (IQR)                     | 517 | 111.00 (53.50 to 232.00)  | 181 | 127.00 (63.00 to 243.50)  | 336 | 102.50 (50.00 to 216.00)  | 0.023 <sup>†</sup>  | ↑          |
| Distribution – no./total no. (%) |     |                           |     |                           |     |                           |                     |            |
| Normal (≤190)                    | 359 | 69.4                      | 113 | 62.4                      | 246 | 73.2                      | 0.011 <sup>‡</sup>  | ⊥ (more ↑) |
| High (>190)                      | 158 | 30.6                      | 68  | 37.4                      | 90  | 26.8                      |                     |            |
| Lactate dehydrogenase (U/L)      |     |                           |     |                           |     |                           |                     |            |
| Median (IQR)                     | 451 | 248.00 (199.00 to 331.00) | 157 | 285.00 (228.00 to 384.50) | 294 | 225.00 (189.00 to 297.75) | <0.001 <sup>†</sup> | ↑          |
| Distribution – no./total no. (%) |     |                           |     |                           |     |                           |                     |            |
| Normal (≤250)                    | 228 | 50.6                      | 55  | 35.0                      | 173 | 58.8                      | <0.001 <sup>‡</sup> | ↑ (less ⊥) |
| High (>250)                      | 223 | 49.4                      | 102 | 65.0                      | 121 | 41.2                      |                     |            |
| <b>Renal function</b>            |     |                           |     |                           |     |                           |                     |            |
| Creatinine (mg/dL)               |     |                           |     |                           |     |                           |                     |            |
| Median (IQR)                     | 585 | 1.00 (0.80 to 1.30)       | 208 | 1.00 (0.80 to 1.34)       | 377 | 1.00 (0.80 to 1.30)       | 0.081 <sup>†</sup>  | =          |
| Distribution – no./total no. (%) |     |                           |     |                           |     |                           |                     |            |
| Low (<0.5)                       | 12  | 2.1                       | 0   | 0                         | 12  | 3.2                       | 0.016 <sup>‡</sup>  | ⊥ (less ↓) |
| Normal (0.5-1.2)                 | 401 | 68.5                      | 139 | 66.8                      | 262 | 69.5                      |                     |            |
| High (>1.2)                      | 172 | 29.4                      | 69  | 33.2                      | 103 | 27.3                      |                     |            |
| Blood urea nitrogen (mg/dL)      |     |                           |     |                           |     |                           |                     |            |
| Median (IQR)                     | 498 | 18.00 (12.00 to 28.00)    | 178 | 17.50 (13.00 to 28.00)    | 320 | 18.00 (12.00 to 28.00)    | 0.555 <sup>†</sup>  | =          |
| Distribution – no./total no. (%) |     |                           |     |                           |     |                           |                     |            |
| Low (<6)                         | 10  | 2.0                       | 1   | 0.6                       | 9   | 2.8                       | 0.227 <sup>‡</sup>  | = (⊥)      |
| Normal (6-25)                    | 341 | 68.5                      | 123 | 69.1                      | 218 | 68.1                      |                     |            |
| High (>25)                       | 147 | 29.5                      | 54  | 30.3                      | 93  | 29.1                      |                     |            |

Abbreviations: f, female; IQR, interquartile range; L, liter; m, male

\* Number of parameters available.

<sup>†</sup> Mann-Whitney U-test

<sup>‡</sup> Chi-square test

<sup>§</sup> Fisher's exact test
